# Supplementary material for: Lymphocyte reconstitution following autologous stem cell transplantation for progressive MS
Source: PubMed Central journal article supplement — Mult Scler J Exp Transl Clin. 2017 Mar 23;3(1):2055217317700167. doi: 10.1177/2055217317700167 (PMC5415040; doi:10.1177/2055217317700167), 2017-03-23
Supplement: MSO700167_supplementary_material.pdf [file MSO700167_supplementary_material.pdf]

## Supplementary Material

Table e-1. Lymphocyte subset results.

| Lymphocyte subset | Control | Baseline | Pre-ASCT     | 1 month       | 3 months     | 6 months     | 9 months     | 12 months    | 18 months    | 24 months    |
|-------------------|---------|----------|--------------|---------------|--------------|--------------|--------------|--------------|--------------|--------------|
| Total lymphocytes | 2.00    | 2.08     | <b>1.07</b>  | <b>1.56</b>   | <b>1.41</b>  | <b>1.49</b>  | 1.80         | 1.67         | 1.48         | 1.64         |
| B-cells           | 261.5   | 299.0    | <b>91.2</b>  | <b>7.8</b>    | 249.8        | 381.7        | 447.9        | 496.1        | <b>503.2</b> | 504.1        |
| NK cells          | 228.5   | 273.7    | <b>127.6</b> | 196.7         | 190.4        | <b>188.7</b> | 264.5        | 182.9        | 207.4        | 213.1        |
| CD8 T-cells       | 523.5   | 502.8    | 390.7        | <b>1050.6</b> | 708.9        | 638.1        | 764.2        | 540.5        | 345.1        | 408.9        |
| CD4 T-cells       | 904.7   | 940.8    | <b>424.0</b> | <b>254.8</b>  | <b>220.0</b> | <b>240.2</b> | <b>379.5</b> | <b>401.4</b> | <b>396.2</b> | <b>445.6</b> |
| Th1 cells         | 128.8   | 113.1    | 73.8         | 132.8         | 139.1        | 117.9        | 112.2        | 100.0        | 66.2         | 80.1         |
| Th2 cells         | 22.3    | 30.3     | 23.9         | 32.9          | 18.9         | 16.3         | 17.6         | 14.7         | 12.4         | 14.3         |
| Th17 cells        | 11.9    | 12.4     | 9.0          | <b>5.4</b>    | <b>4.8</b>   | 7.0          | 5.3          | 11.5         | 27.3         | 29.4         |
| T-regs            | 40.3    | 44.6     | 29.4         | <b>15.2</b>   | <b>12.4</b>  | <b>12.5</b>  | <b>20.4</b>  | <b>17.9</b>  | <b>22.1</b>  | <b>16.3</b>  |
| T-naive           | 425.4   | 420.5    | 122.1        | <b>5.5</b>    | <b>8.7</b>   | <b>34.7</b>  | <b>99.4</b>  | 147.5        | 167.2        | 163.2        |

|     |       |       |             |            |            |             |      |       |       |       |
|-----|-------|-------|-------------|------------|------------|-------------|------|-------|-------|-------|
| RTE | 276.4 | 283.4 | <b>86.1</b> | <b>2.6</b> | <b>4.2</b> | <b>26.5</b> | 88.6 | 129.5 | 118.8 | 132.7 |
|-----|-------|-------|-------------|------------|------------|-------------|------|-------|-------|-------|

Total lymphocyte results are reported as  $\times 10^9/L$ . All other lymphocyte subsets are reported as  $\times 10^6/L$ . Mean values are presented. Figures in bold are significantly different from baseline values ( $p < 0.05$ ). Pre-ASCT is after stem cell mobilisation and before ASCT. RTE (recent thymic emigrants).

## Supplementary Figures

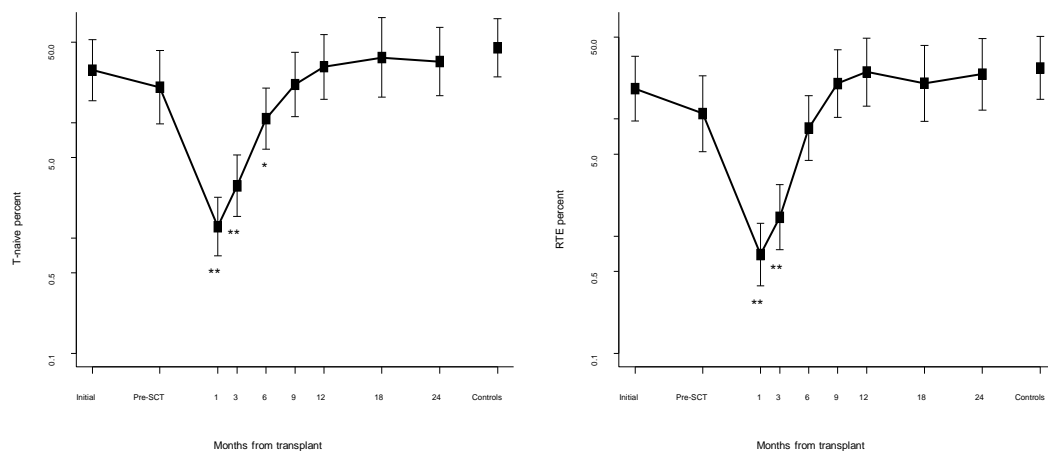

**Supplementary Figure 1.** T-naïve cells and recent thymic emigrants as a percentage of total CD4 cells.

Mean percentages  $\pm$  2SE (log scale) are shown. \*  $p < 0.05$  vs Initial, \*\*  $p < 0.0005$  vs Initial. Pre-SCT is after stem cell mobilisation and before ASCT.

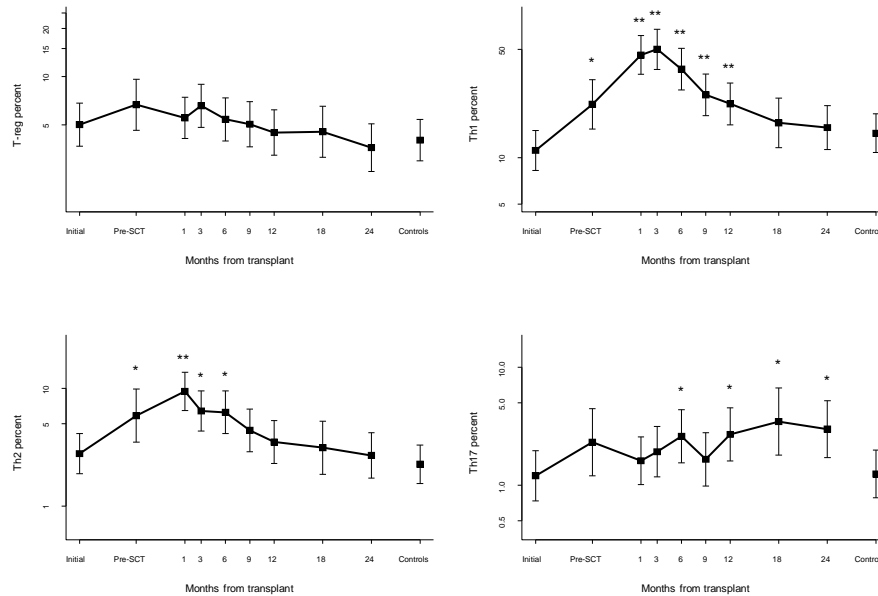

**Supplementary Figure 2.** T-reg, Th1, Th2 and Th17 as a percentage of total CD4 cells.

Mean percentages  $\pm$  2SE (log scale) are shown. \*  $p < 0.05$  vs Initial, \*\*  $p < 0.0005$  vs Initial. Pre-SCT is after stem cell mobilisation and before ASCT.
